# Supplementary material for: Dominant and novel clades of Candidatus Accumulibacter phosphatis in 18 globally distributed full-scale wastewater treatment plants
Source: PubMed Central journal article supplement (PMC4490554; doi:10.1038/srep11857), 2015-07-03
Supplement: srep11857-s1.pdf [file srep11857-s1.pdf]

## Supplementary Information

### **Dominant and novel clades of *Candidatus Accumulibacter phosphatis* in 18 globally distributed full-scale wastewater treatment plants**

Yanping Mao<sup>1</sup>, David W. Graham<sup>2</sup>, Hideyuki Tamaki<sup>3</sup>, Tong Zhang<sup>1\*</sup>

<sup>1</sup>Environmental Biotechnology Laboratory, Department of Civil Engineering, The University of Hong Kong, Pokfulam Road, Hong Kong

<sup>2</sup>School of Civil Engineering and Geosciences, Newcastle University, Newcastle upon Tyne NE1 7RU, United Kingdom

<sup>3</sup>Bioproduction Research Institute, National Institute of Advanced Industrial Science and Technology (AIST), Tsukuba, Japan

\*Corresponding author: Tong Zhang, Environmental Biotechnology Laboratory, Department of Civil Engineering, The University of Hong Kong, Pokfulam Road, Hong Kong. E-mail: zhangt@hku.hk

## Figure and Table Captions

**Table S1.** Optimal primers information and qPCR conditions for this study.

**Table S2.** Relative distribution (%) of indicated clade of *Accumulibacter* in the bacterial communities according to the qPCR analysis using *ppk1* gene as biomarker.

**Table S3.** Relative distribution (%) of indicated clade within the *Accumulibacter* lineage by estimating the total abundance of the *Accumulibacter* lineage based on the qPCR assays targeting the 16S rRNA genes.

**Table S4.** Summary statistics for redundancy analysis based on the relative abundances of different *Accumulibacter* clades in the bacterial communities.

**Table S5.** Summary statistics for redundancy analysis based on the relative abundances of different *Accumulibacter* clades in the *Accumulibacter* lineage.

**Table S6.** Reference 16S rRNA gene sequences of *Accumulibacter* lineage.

**Figure S1.** Validation curves plotting the dilution of sludge samples against the Ct values. PCR amplification efficiencies were calculated according to the equation:  $E = 10^{-1/\text{slope}} - 1$  to validate whether the sludge samples contained substances that inhibit PCR.

**Figure S2.** Phylogenetic tree of *ppk1* gene sequences from PCR amplification products using primer sets targeting a) clade IA, b) clade IIA, c) clade IIB, d) clade IIC and e) clade IID in the *Accumulibacter* lineage.

**Figure S3.** Maximum likelihood phylogenetic tree of *Accumulibacter ppk1* gene sequences. Over 360 of published *ppk1* nucleotide reference sequences<sup>2</sup> were downloaded from NCBI

database. Sequences belonging to *Accumulibacter* clades IIIH and II-I are from the clone libraries. The node labels refer to bootstrap support values.

**Figure S4.** Agarose gel electrophoresis images of the qPCR products targeting the *ppk1* genes in clades IIB and IIC respectively. Plasmids containing specific copy numbers of *ppk1* genes were used for drawing the standard curves. Some *ppk1* genes amplified from the activated sludge samples by using the *ppk1* gene primer sets were visualized. Sterile water was used for the negative control.

**Table S1.** Optimal primers information and qPCR conditions for this study.

| Target                                               | Primer         | Sequence (5' – 3')     | T <sup>a</sup> ( °C) | Primer concentration (nM) | Standard curve correlation efficient (R <sup>2</sup> ) | PCR efficiency (%) |
|------------------------------------------------------|----------------|------------------------|----------------------|---------------------------|--------------------------------------------------------|--------------------|
| Acc-IA <i>ppk1</i>                                   | Acc-ppk1-763f  | GACGAAGAAGCGGTCAAG     | 61                   | 500                       | 0.99 ± 0.01                                            | 105 ± 2            |
|                                                      | Acc-ppk1-1170r | AACGGTCATCTTGATGGC     |                      |                           |                                                        |                    |
| Acc-IIA <i>ppk1</i>                                  | Acc-ppk1-893f  | AGTTCAATCTCACCGAGAGC   | 61                   | 400 <sup>a</sup>          | 0.98 ± 0.01                                            | 92 ± 5             |
|                                                      | Acc-ppk1-997r  | GGAACTTCAGGTCGTTGC     |                      |                           |                                                        |                    |
| Acc-IIB <i>ppk1</i>                                  | Acc-ppk1-870f  | GATGACCCAGTTCCTGCTCG   | 61                   | 400                       | 0.98 ± 0.01                                            | 88 ± 2             |
|                                                      | Acc-ppk1-1002r | CGGCACGAACTTCAGATCG    |                      |                           |                                                        |                    |
| Acc-IIC <i>ppk1</i> excluding OTU NS D3 <sup>b</sup> | Acc-ppk1-1123f | GAACAGTCCGCCAACGACC    | 63                   | 500                       | 0.97 ± 0.01                                            | 97 ± 5             |
|                                                      | Acc-ppk1-1376r | ACGATCATCAGCATCTTGCC   |                      |                           |                                                        |                    |
| Acc-IID <i>ppk1</i>                                  | Acc-ppk1-375f  | GGGTATCCGTTTCCTCAAGCG  | 63                   | 400                       | 0.97 ± 0.01                                            | 97 ± 4             |
|                                                      | Acc-ppk1-522r  | GAGGCTCTTGTTGAGTACACGC |                      |                           |                                                        |                    |
| Acc 16S rRNA genes                                   | 518f           | CCAGCAGCCGCGGTAAT      | 65                   | 400                       | 0.99 ± 0.01                                            | 106 ± 1            |
|                                                      | 846r           | GTTAGCTACGGCACTAAAAGG  |                      |                           |                                                        |                    |
| Bacterial 16S rRNA genes                             | 341f           | CCTACGGGAGGCAGCAG      | 60                   | 400                       | 0.98 ± 0.01                                            | 87 ± 1             |
|                                                      | 534r           | ATTACCGCGGCTGCTGG      |                      |                           |                                                        |                    |

<sup>a</sup> Modified qPCR condition from previously published paper <sup>1</sup>.

<sup>b</sup> The relative abundance of Accumulibacter in Clade IIC was estimated by the qPCR assay using primer sets targeting Accumulibacter IIC excluding OTU NS D3 <sup>1</sup>.

**Table S2.** Relative distribution (%) of indicated clade of *Accumulibacter* in the bacterial communities according to the qPCR analysis using *ppk1* gene as biomarker.

| Sample    | I           | IIA         | IIB         | IIC         | IID         |
|-----------|-------------|-------------|-------------|-------------|-------------|
| UK-WL-OW  | <b>1.64</b> | 0.11        | 0.25        | 0.08        | 0.60        |
| UK-NW-NW  | 0.10        | 0.00        | 0.20        | 0.06        | <b>1.45</b> |
| UK-SB-SB  | 0.03        | 0.01        | 0.00        | <b>0.06</b> | 0.00        |
| UK-LB-LB  | <b>0.79</b> | 0.24        | 0.26        | 0.05        | 0.24        |
| US-CO-CO  | 0.02        | 0.01        | <b>0.22</b> | 0.01        | 0.06        |
| US-GR-PC  | 0.01        | 0.22        | 0.11        | <b>0.22</b> | 0.00        |
| CA-GP-GP  | 0.00        | 0.00        | 0.00        | 0.00        | 0.00        |
| JP-A2O-TK | 0.03        | 0.00        | 0.47        | <b>0.60</b> | 0.06        |
| JP-STD-TK | 0.00        | <b>0.32</b> | 0.06        | 0.14        | 0.00        |
| SG-SG-UP  | <b>3.68</b> | 0.19        | 0.48        | 0.60        | 2.07        |
| CN-BJ-BX  | 0.04        | 0.01        | 0.05        | <b>0.07</b> | 0.10        |
| CN-NJ-SJ  | 0.00        | 0.00        | 0.00        | 0.01        | <b>0.91</b> |
| CN-SH-MH  | 0.00        | 0.31        | 0.09        | <b>0.38</b> | 0.07        |
| CN-GZ-DT  | 0.00        | 0.35        | 0.29        | <b>0.40</b> | 0.28        |
| CN-WH-LW  | 0.00        | <b>2.02</b> | 1.36        | 0.50        | 0.00        |
| CN-QD-TD  | 0.00        | 0.00        | 0.05        | 0.07        | <b>0.31</b> |
| CN-HK-ST  | 0.00        | 0.00        | 0.00        | 0.00        | <b>0.00</b> |
| CN-HK-SH  | 0.00        | 0.00        | 0.14        | <b>0.33</b> | 0.01        |

**Table S3.** Relative distribution (%) of indicated clade within the Accumulibacter lineage by estimating the total abundance of the Accumulibacter lineage based on the qPCR assays targeting the 16S rRNA genes.

| Sample    | I    | IIA  | IIB  | IIC  | IID  | Other clades |
|-----------|------|------|------|------|------|--------------|
| UK-WL-OW  | 49.2 | 3.4  | 7.5  | 2.3  | 17.9 | 19.7         |
| UK-NW-NW  | 5.2  | 0.0  | 10.6 | 3.4  | 78.3 | 2.5          |
| UK-SB-SB  | 26.6 | 7.0  | 3.5  | 62.6 | 0.0  | 0.0          |
| UK-LB-LB  | 39.7 | 12.1 | 12.9 | 2.5  | 12.0 | 20.8         |
| US-CO-CO  | 3.7  | 1.0  | 32.7 | 1.3  | 8.7  | 52.6         |
| US-GR-PC  | 1.0  | 14.6 | 7.2  | 14.9 | 0.0  | 62.4         |
| CA-GP-GP  | 0.0  | 0.0  | 0.0  | 0.0  | 0.0  | 0.0          |
| JP-A2O-TK | 1.8  | 0.0  | 30.9 | 39.6 | 3.7  | 24.0         |
| JP-STD-TK | 0.0  | 39.9 | 7.6  | 17.0 | 0.0  | 35.5         |
| SG-SG-UP  | 26.0 | 1.4  | 3.4  | 4.3  | 14.6 | 50.5         |
| CN-BJ-BX  | 3.3  | 0.5  | 4.3  | 6.3  | 9.3  | 76.3         |
| CN-NJ-SJ  | 0.0  | 0.0  | 0.0  | 0.9  | 99.5 | 0.0          |
| CN-SH-MH  | 0.0  | 12.7 | 3.8  | 15.5 | 2.8  | 65.3         |
| CN-GZ-DT  | 0.0  | 7.5  | 6.3  | 8.7  | 6.0  | 71.6         |
| CN-WH-LW  | 0.0  | 25.6 | 17.2 | 6.3  | 0.0  | 50.8         |
| CN-QD-TD  | 0.0  | 0.0  | 0.5  | 0.7  | 3.1  | 95.6         |
| CN-HK-ST  | 0.1  | 0.0  | 0.0  | 0.2  | 0.5  | 99.3         |
| CN-HK-SH  | 0.0  | 0.0  | 4.4  | 10.6 | 0.3  | 84.7         |

**Table S4.** Summary statistics for redundancy analysis based on the relative abundances of different *Accumulibacter* clades in the bacterial communities.

|                      | Explain | P-value (focus scaling on inter-clades correlation) | P-value (focus scaling on inter-sample distance) |
|----------------------|---------|-----------------------------------------------------|--------------------------------------------------|
| TP                   | 0.17    | 0.08                                                | 0.08                                             |
| Latitude             | 0.11    | 0.16                                                | 0.16                                             |
| COD                  | 0.04    | 0.42                                                | 0.42                                             |
| Sampling temperature | 0.04    | 0.63                                                | 0.63                                             |
| TN                   | 0.02    | 0.56                                                | 0.56                                             |

Abbreviations: TP, total phosphorus; COD, chemical oxygen demand; TN, total nitrogen.

**Table S5.** Summary statistics for redundancy analysis based on the relative abundances of different *Accumulibacter* clades in the *Accumulibacter* lineage.

|                      | Explain | P-value (focus scaling on inter-clades correlation) | P-value (focus scaling on inter-sample distance) |
|----------------------|---------|-----------------------------------------------------|--------------------------------------------------|
| TP                   | 0.15    | <b>0.04</b>                                         | <b>0.04</b>                                      |
| COD                  | 0.14    | <b>0.05</b>                                         | 0.06                                             |
| TN                   | 0.12    | 0.06                                                | 0.07                                             |
| Sampling temperature | 0.02    | 0.85                                                | 0.86                                             |
| Latitude             | 0.01    | 0.98                                                | 0.98                                             |

Abbreviations: TP, total phosphorus; COD, chemical oxygen demand; TN, total nitrogen.

**Table S6.** Reference 16S rRNA gene sequences of Accumulibacter lineage.

| PAO            | Clade     | Accession NO. | Ref. |
|----------------|-----------|---------------|------|
| Accumulibacter | I         | AF204244      | 1    |
|                |           | AF255641      |      |
|                |           | AF502224      |      |
|                |           | AF502225      |      |
|                |           | AJ224937      |      |
|                |           | AY064178      |      |
|                |           | AY064179      |      |
|                |           | EF565148      |      |
|                | IIA       | AF204247      |      |
|                |           | AF502227      |      |
|                |           | AF502229      |      |
|                |           | AF502230      |      |
|                |           | AF502231      |      |
|                |           | EF565147      |      |
|                |           | EF565153      |      |
|                |           | EF565155      |      |
|                | IIB       | EF565156      |      |
|                |           | EF565149      |      |
|                |           | EF565150      |      |
|                |           | EF565152      |      |
|                | IIC & IID | EF565157      |      |
| AY062125       |           |               |      |
| EF565151       |           |               |      |
| EF565158       |           |               |      |
| EF565159       |           |               |      |
| EF565160       |           |               |      |
| EF565161       |           |               |      |



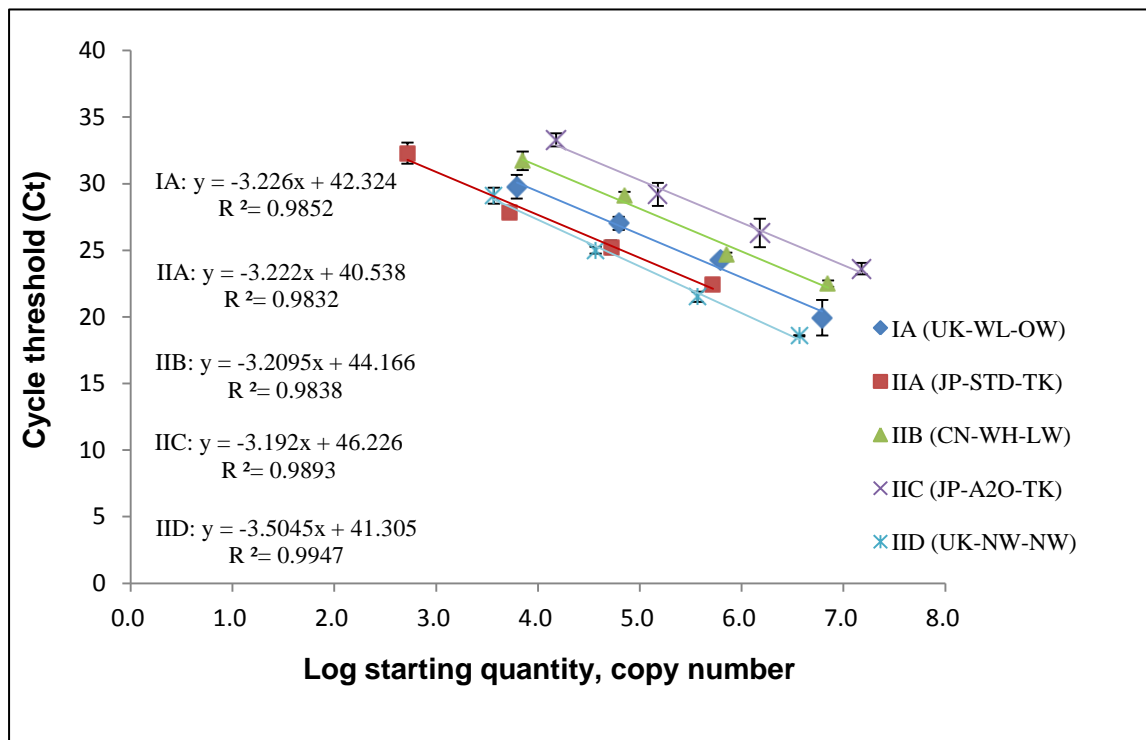

**Figure S1.** Validation curves plotting the dilution of sludge samples against the Ct values. PCR amplification efficiencies were calculated according to the equation:  $E = 10^{-1/\text{slope}} - 1$  to validate whether the sludge samples contained substances that inhibit PCR.

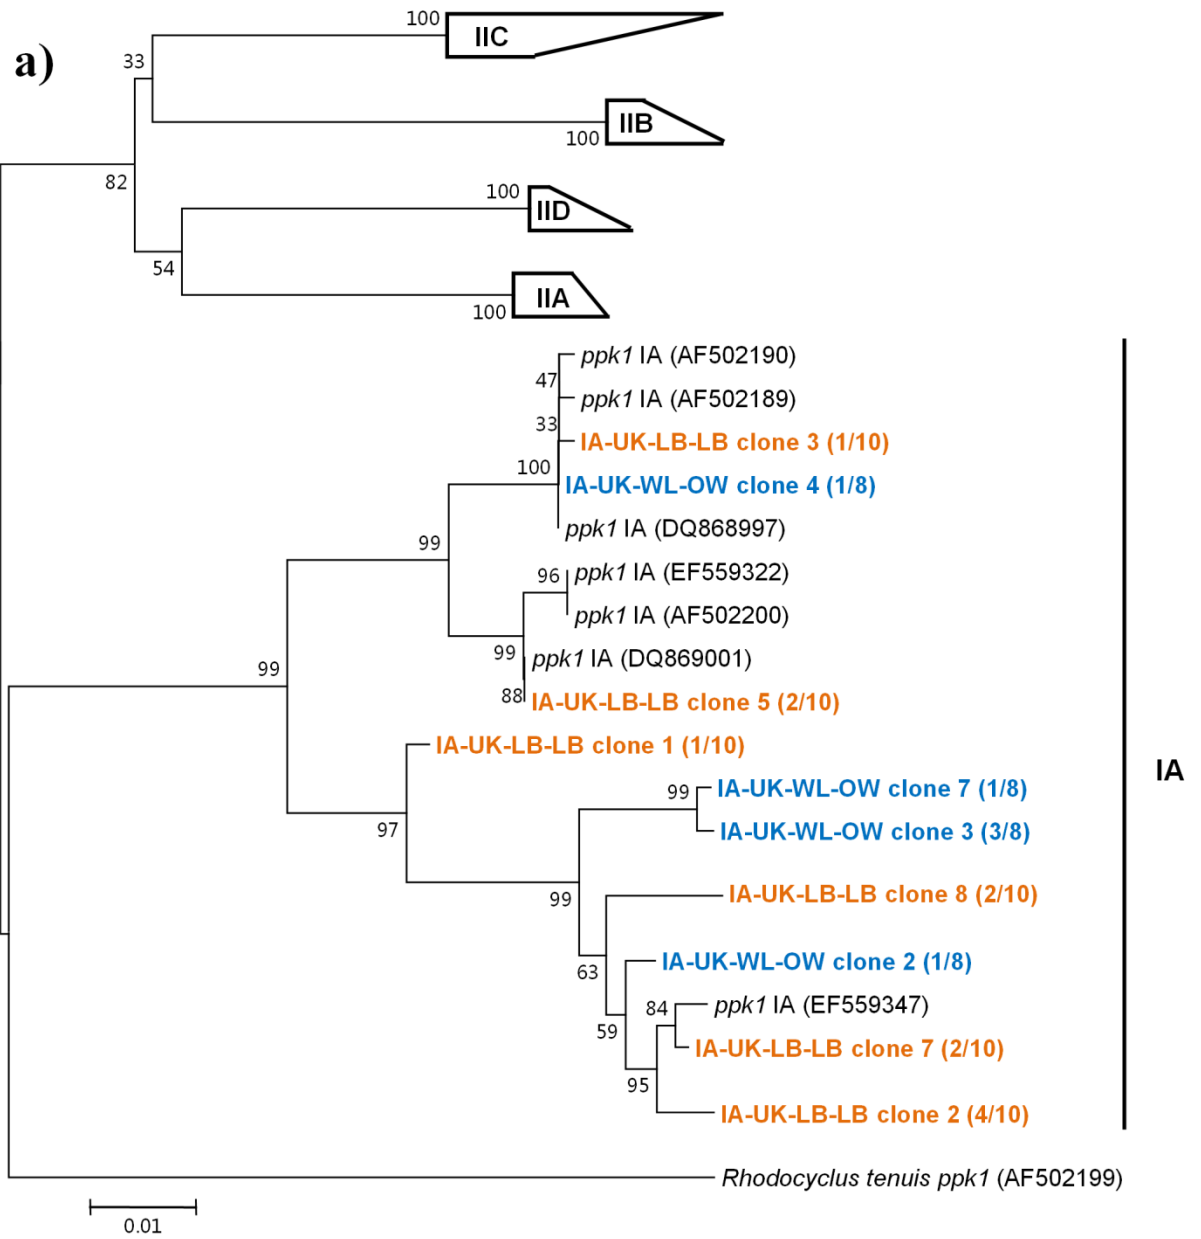

b)

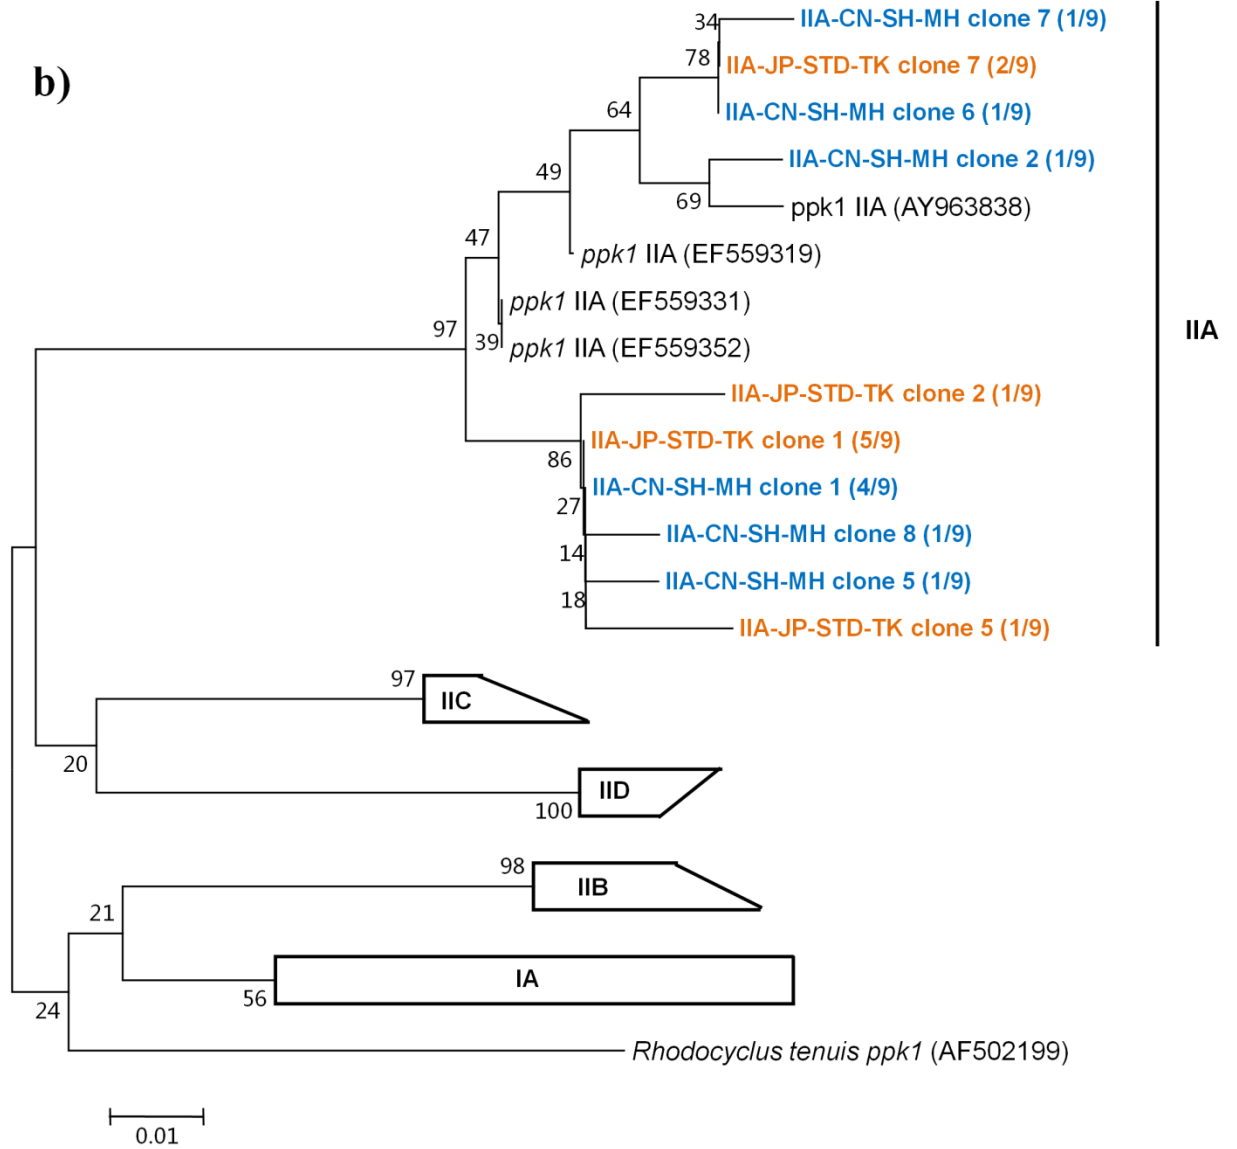

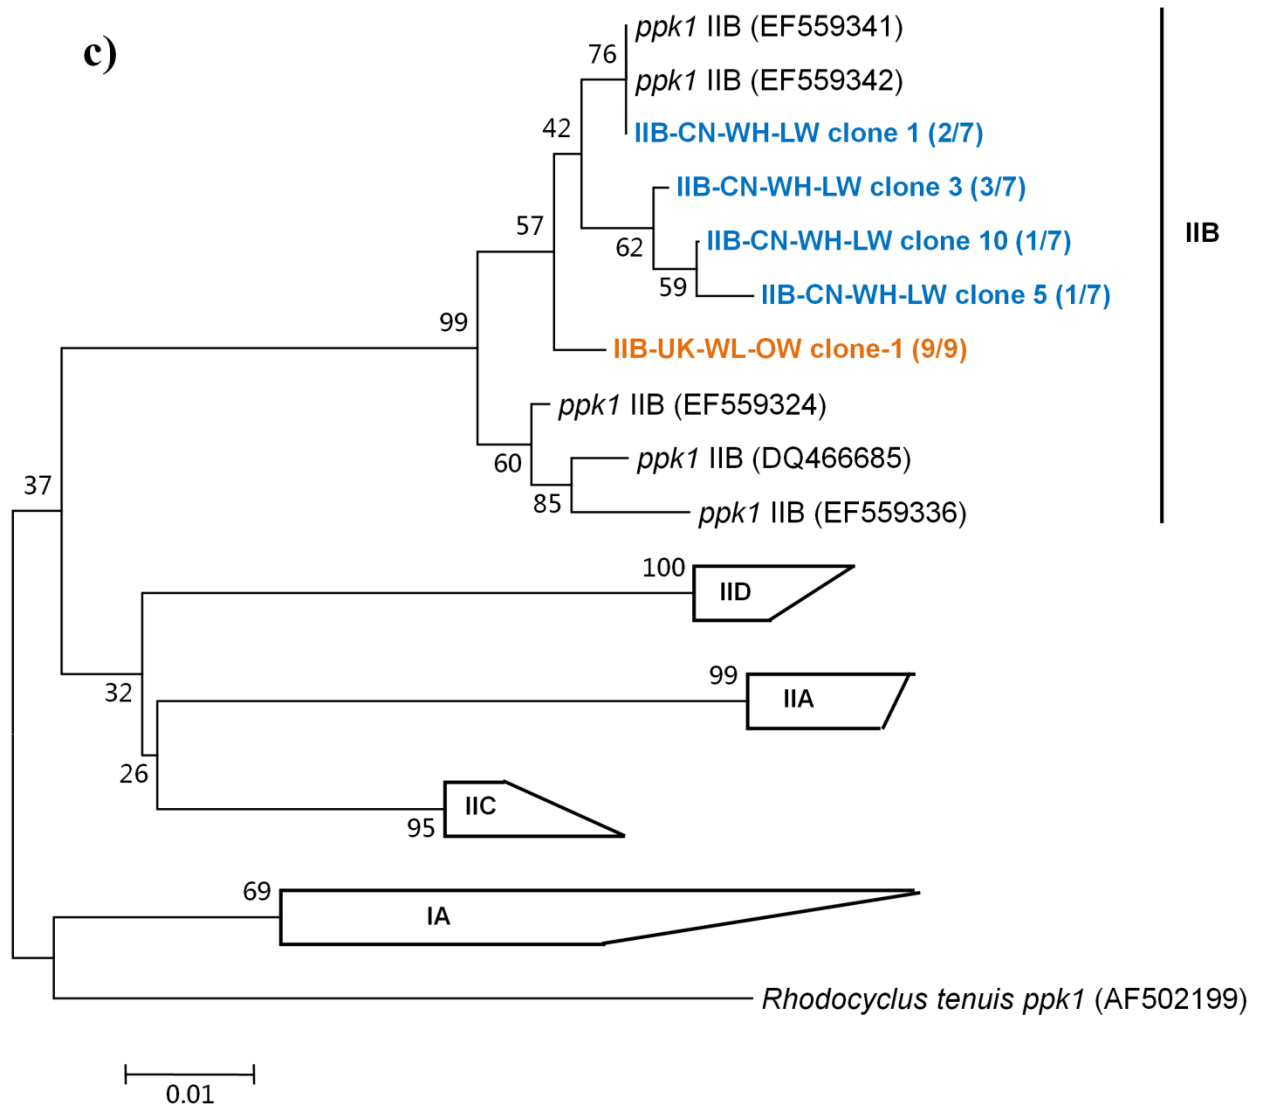

d)

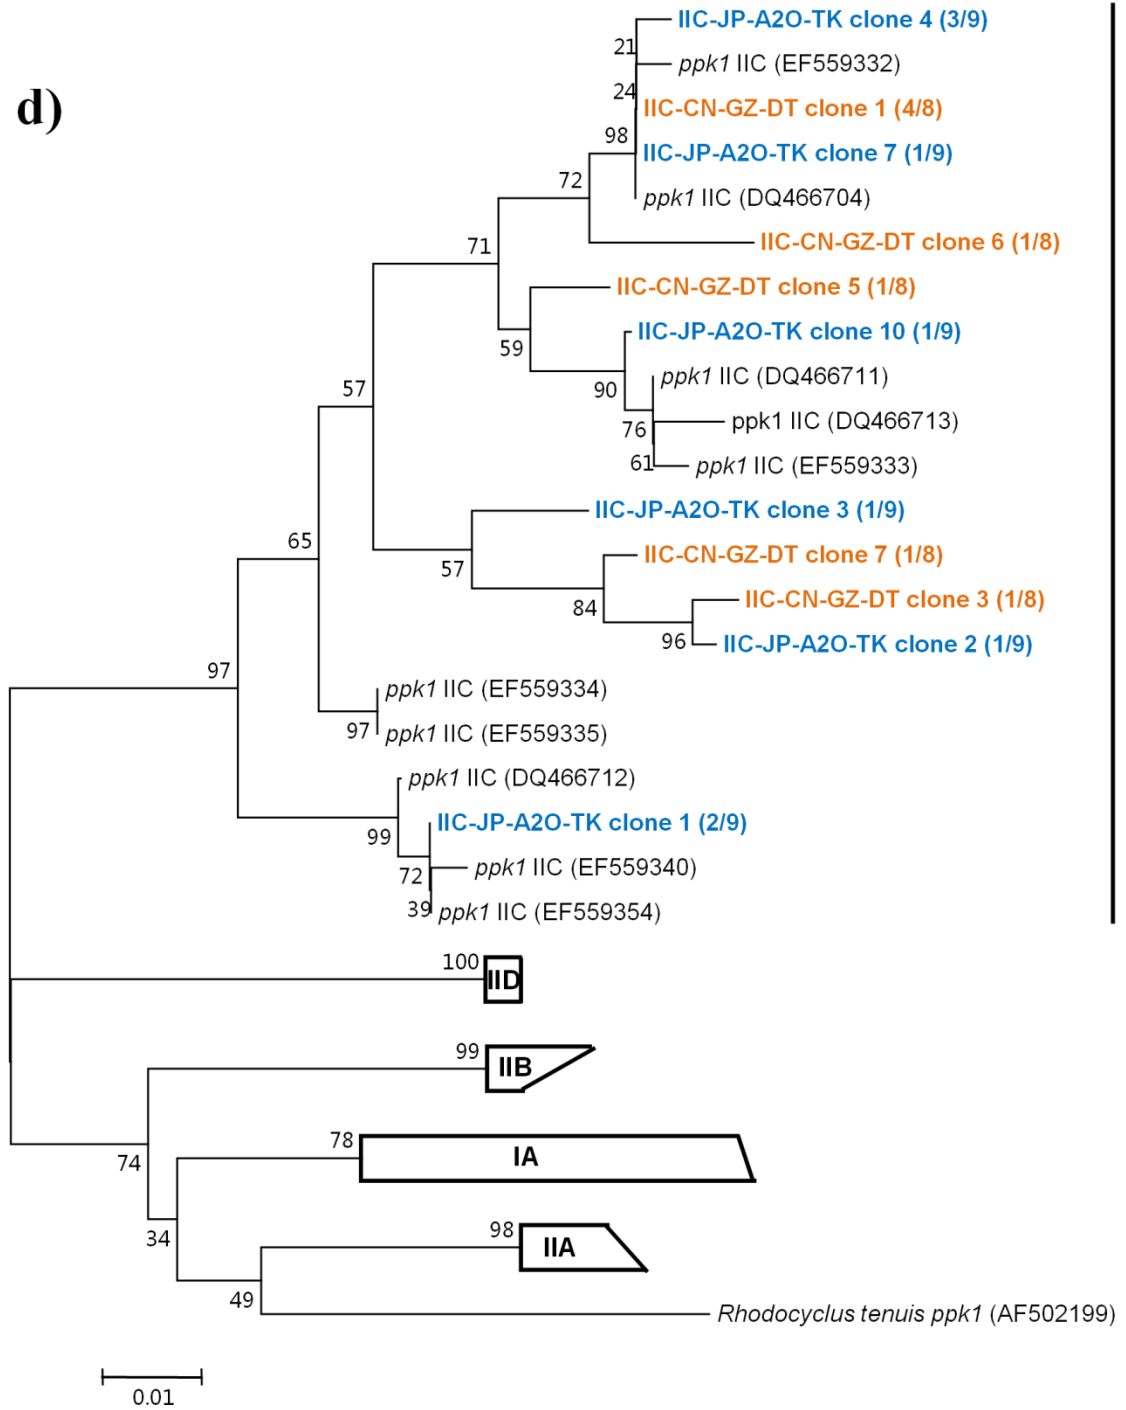

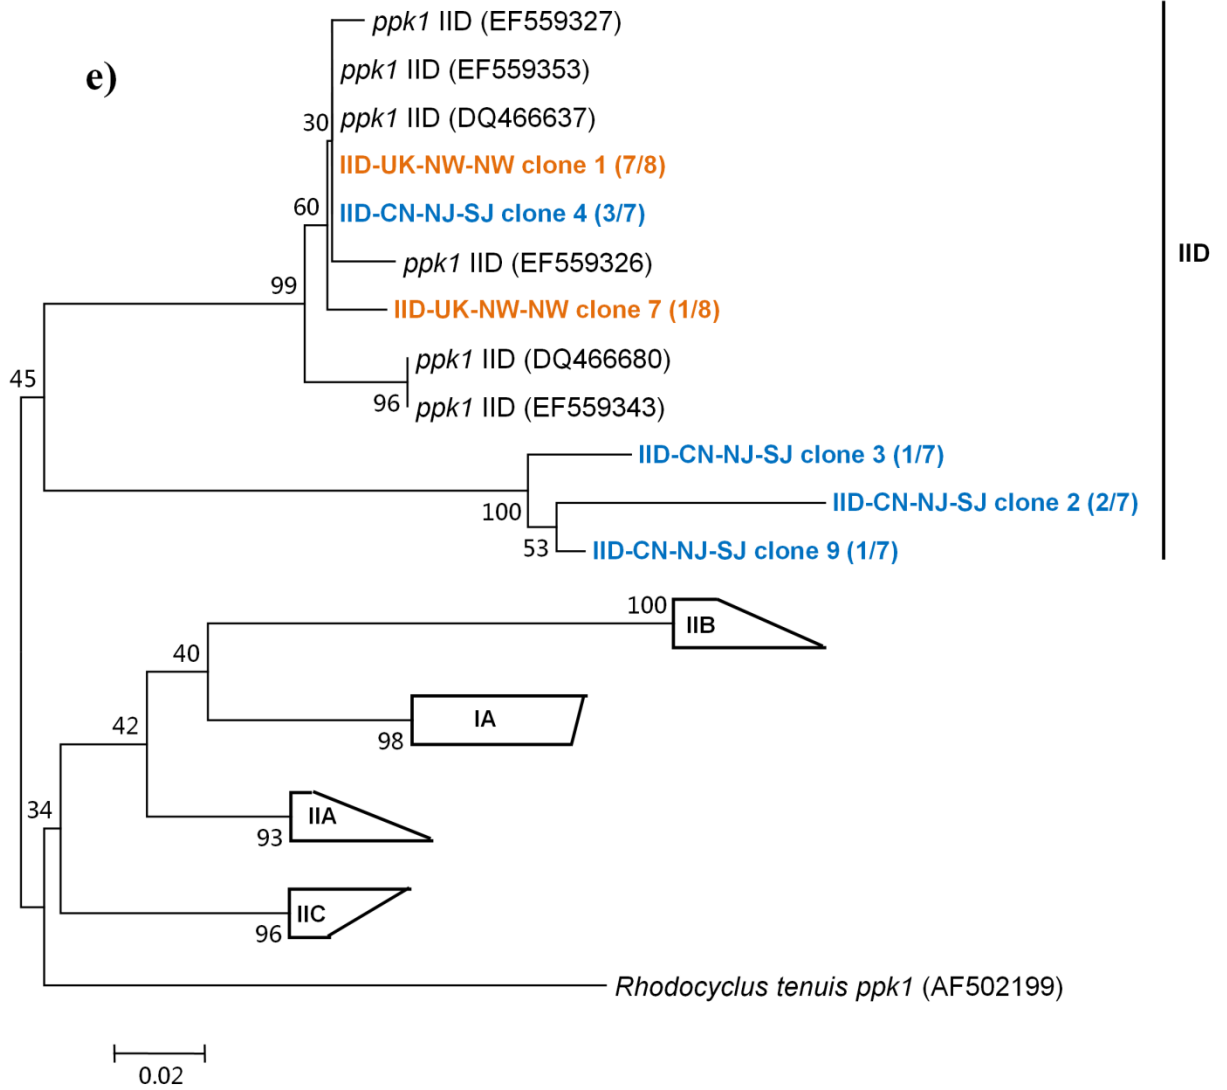

**Figure S2.** Phylogenetic tree of *ppk1* gene sequences from PCR amplification products using primer sets targeting a) clade IA, b) clade IIA, c) clade IIB, d) clade IIC and e) clade IID in the *Accumulibacter* lineage.

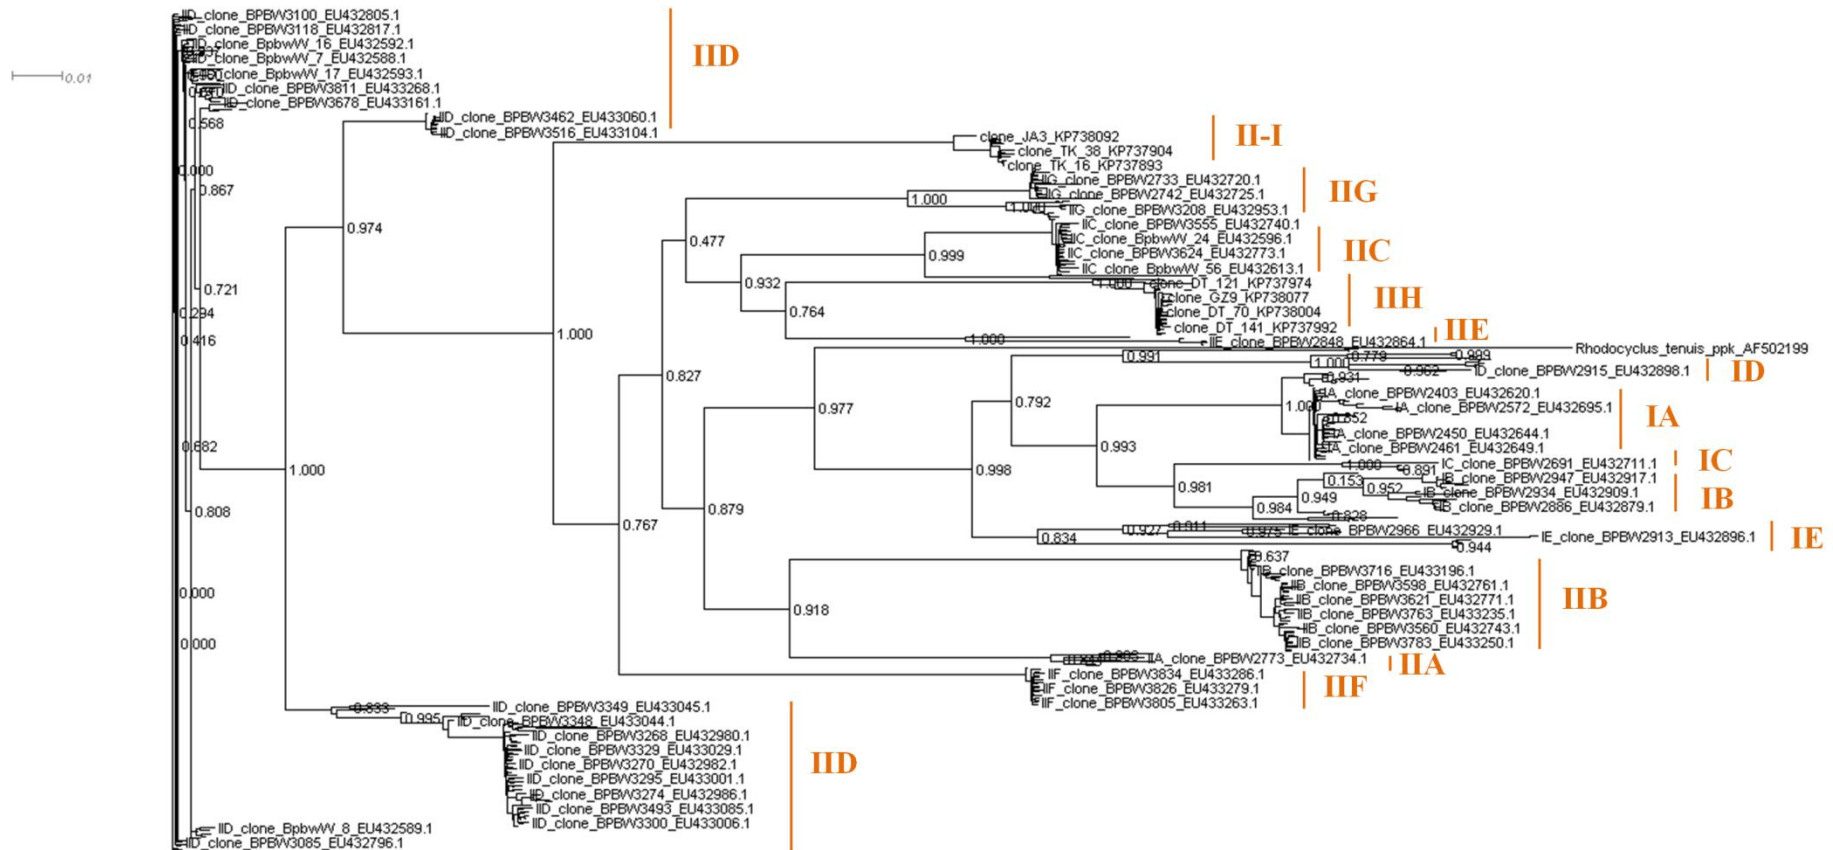

**Figure S3.** Maximum likelihood phylogenetic tree of *Accumulibacter ppk1* gene sequences. Over 360 of published *ppk1* nucleotide reference sequences<sup>2</sup> were downloaded from NCBI database. Sequences belonging to *Accumulibacter* clades IIH and II-I are from the clone libraries. The node labels refer to bootstrap support values.

qPCR results targeting *ppk1* genes in clade IIB

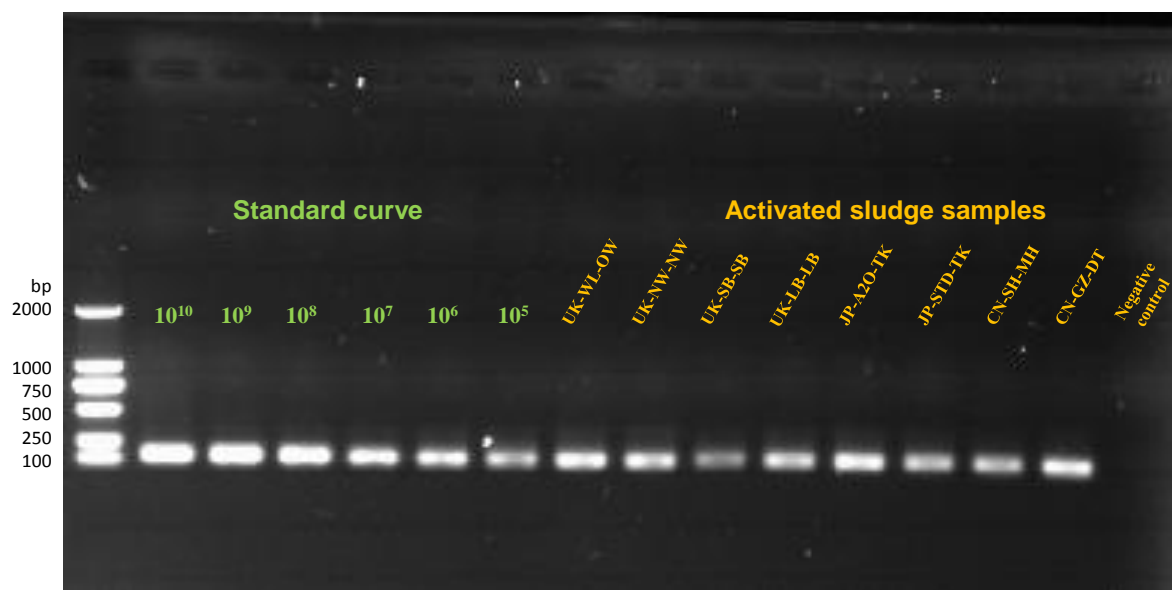

qPCR results targeting *ppk1* genes in clade IIC

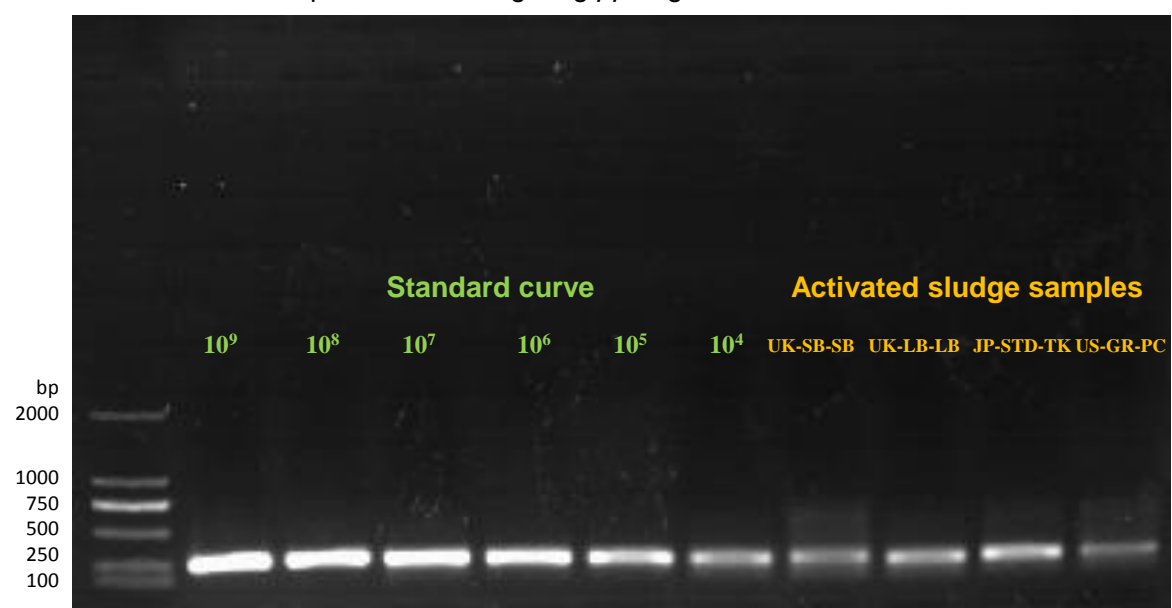

**Figure S4.** Agarose gel electrophoresis images of the qPCR products targeting the *ppk1* genes in clades IIB and IIC respectively. Plasmids containing specific copy numbers of *ppk1* genes were used for drawing the standard curves. Some *ppk1* genes amplified from the activated sludge samples by using the *ppk1* gene primer sets were visualized. Sterile water was used for the negative control.



## REFERENCE

1. He, S., Gall, D. L. & McMahon, K. D. "*Candidatus Accumulibacter*" population structure in enhanced biological phosphorus removal sludges as revealed by polyphosphate kinase genes. *Appl. Environ. Microbiol.* **73**, 5865-5874, doi:10.1128/aem.01207-07 (2007).
2. Peterson, S. B., Warnecke, F., Madejska, J., McMahon, K. D. & Hugenholtz, P. Environmental distribution and population biology of *Candidatus Accumulibacter*, a primary agent of biological phosphorus removal. *Environ. Microbiol.* **10**, 2692-2703, doi:10.1111/j.1462-2920.2008.01690.x (2008).
